# Supplementary material for: Combined targeting of G protein‐coupled receptor and EGF receptor signaling overcomes resistance to PI3K pathway inhibitors in PTEN‐null triple negative breast cancer
Source: PubMed Central journal article supplement (PMC7411640; doi:10.15252/emmm.202011987), 2020-07-16

Fig 4D Vinculin

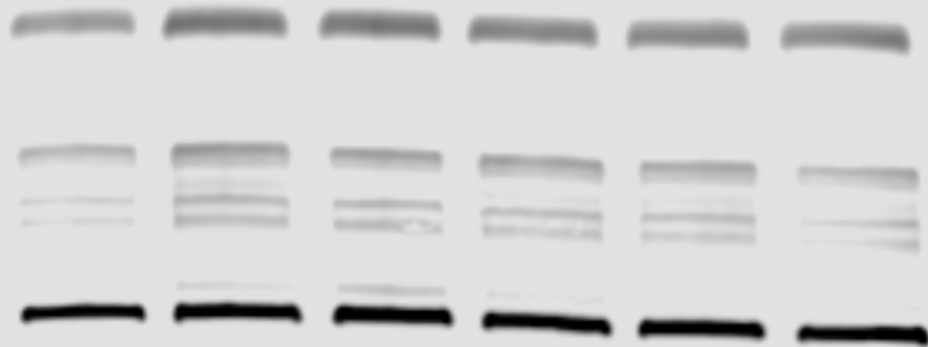

Fig 4D EGFRtot

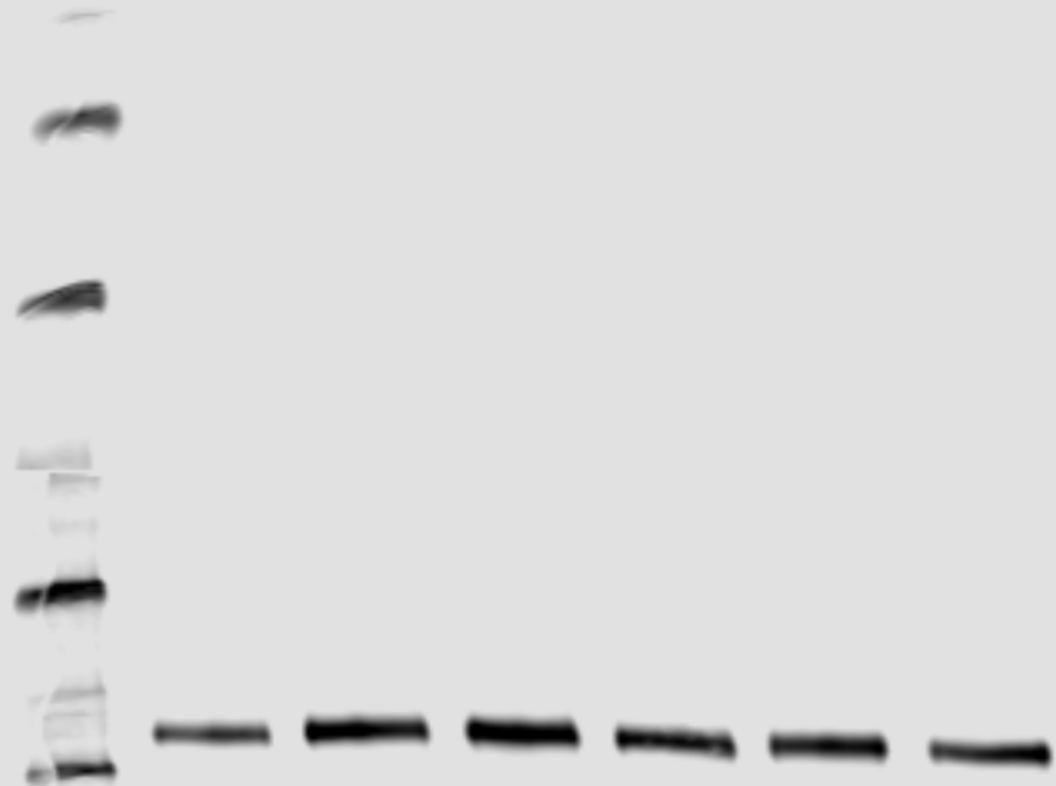

Fig 4D GNB2

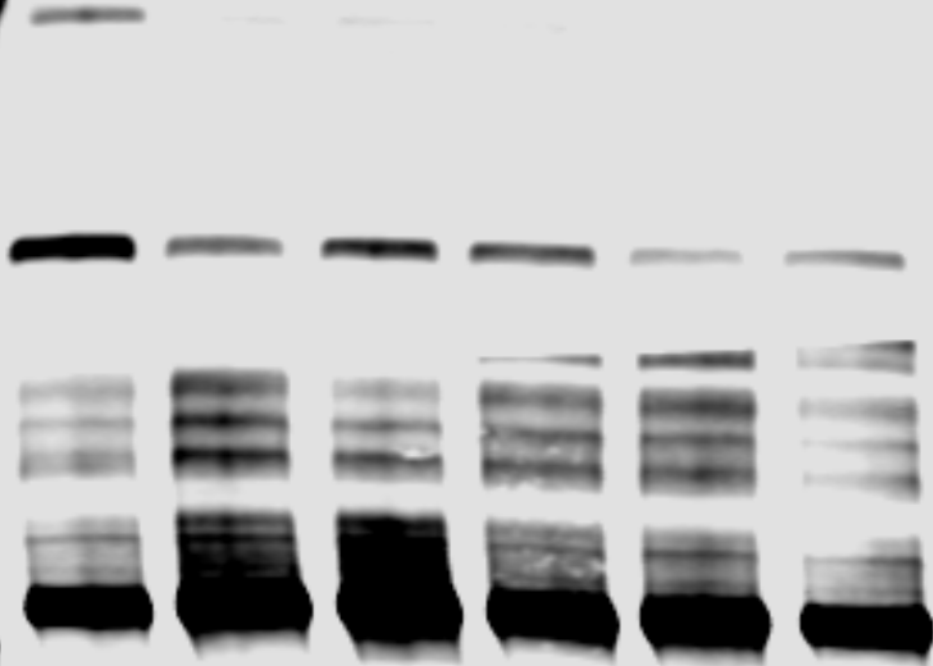

Fig 4D pAKT\_right blot

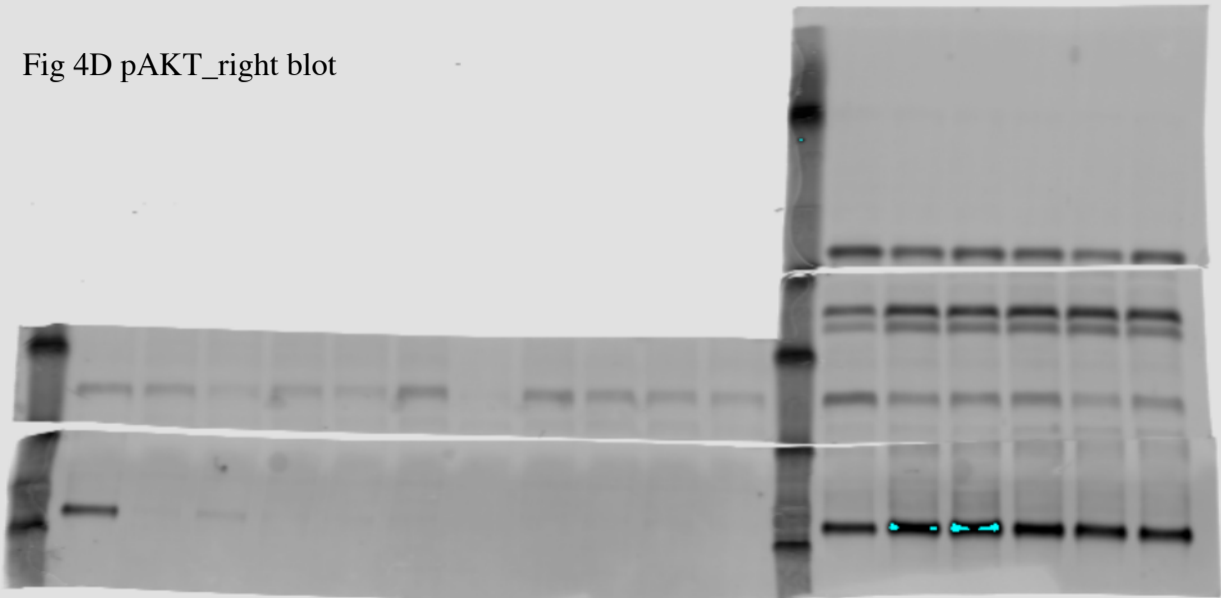

Fig 4D pEGFR pERK pS6 blot2\_right blot

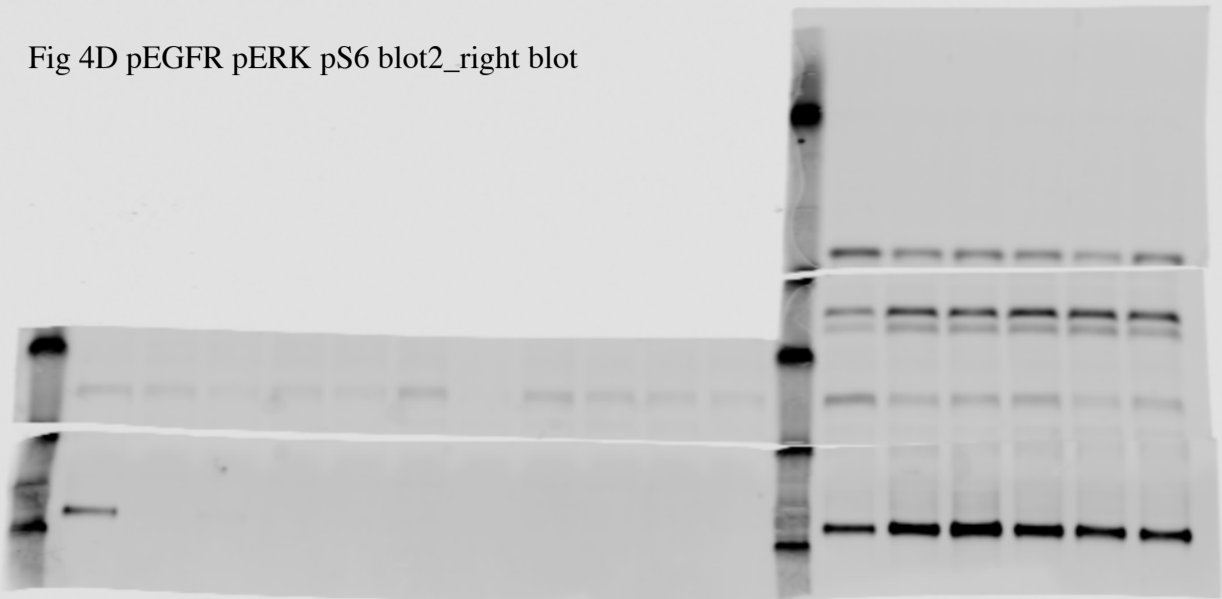

Fig 4D S6tot \_right blot

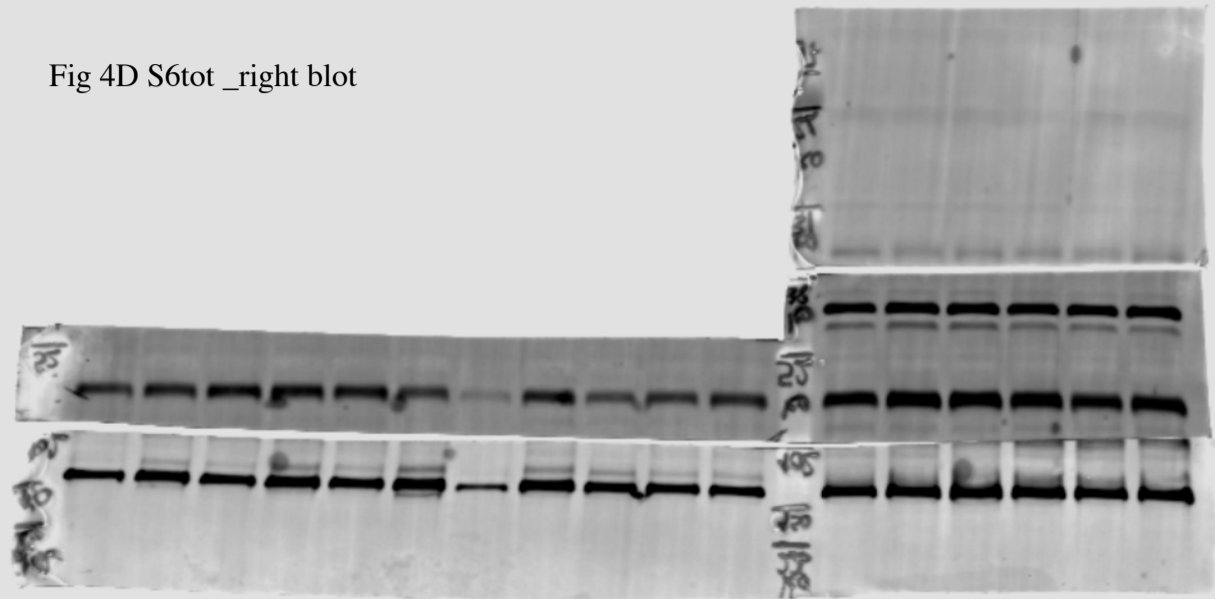

Fig 4D Vinculin AKTtot ERKtot \_right blot

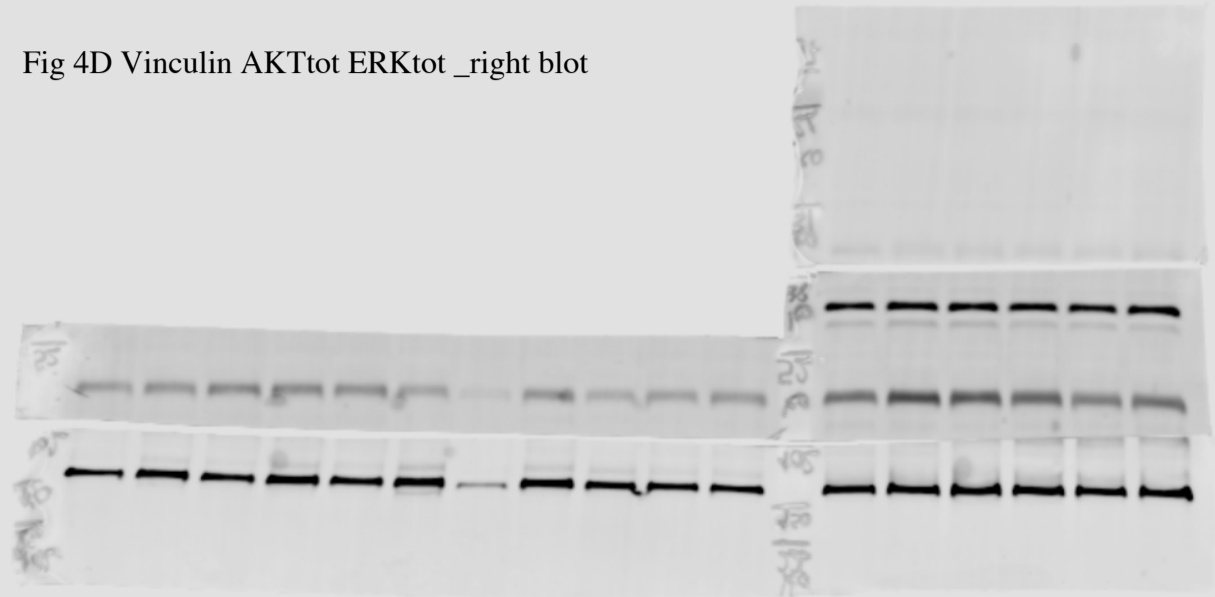

Supplement: EMMM-12-e11987-s009.pdf [file EMMM-12-e11987-s009.pdf]
